# Supplementary material for: Sex Differences in Salmonellosis Incidence Rates—An Eight-Country National Data-Pooled Analysis
Source: MDPI journal article supplement (doi:10.3390/jcm10245767), 2021-12-09
Supplement: s1 [file s1]

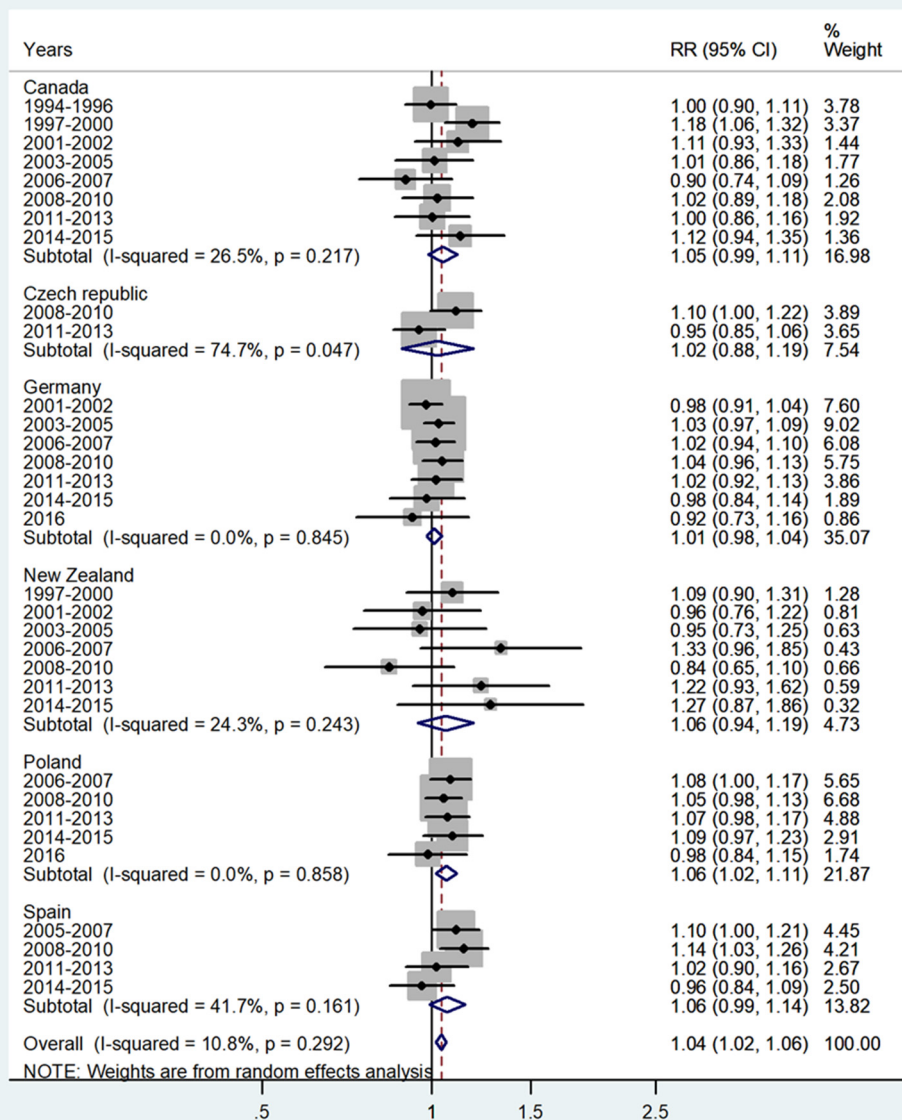

**Figure S1.** Male: female salmonellosis incidence rate ratios (RR) for different years and countries at age <1.

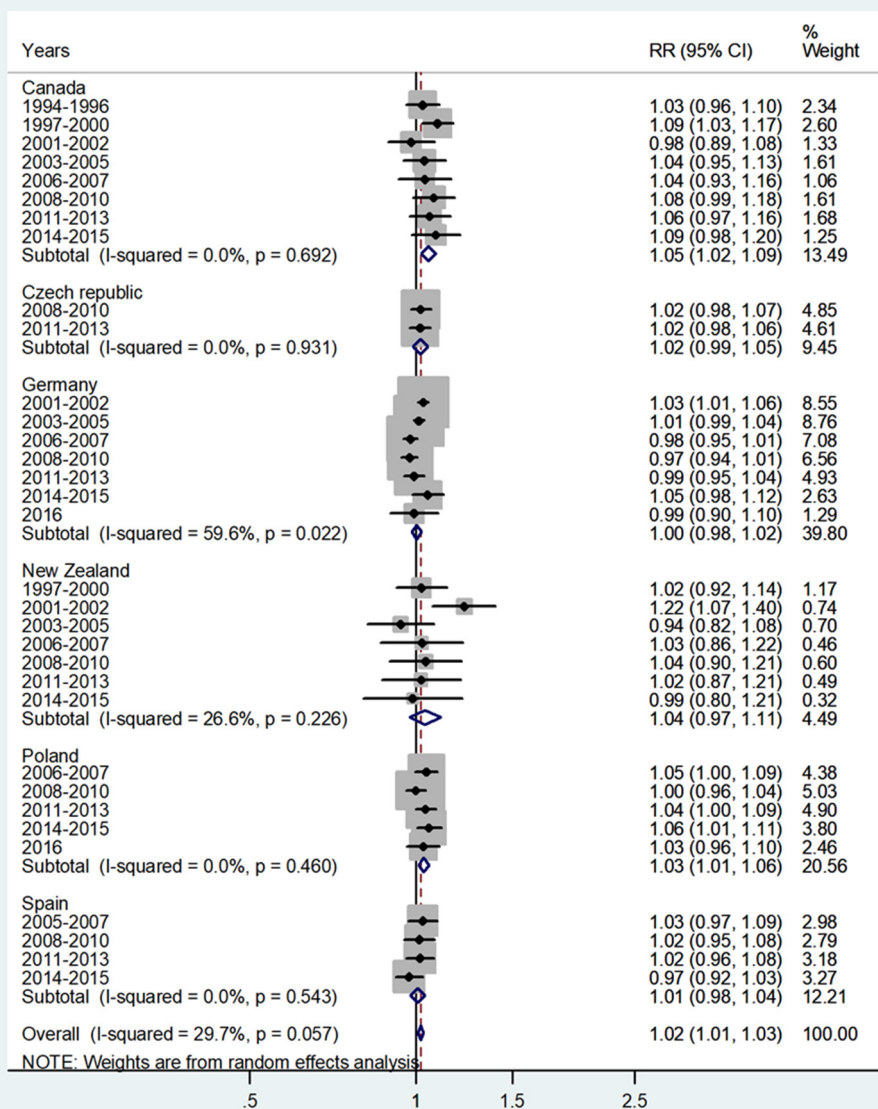

**Figure S2.** Male: female salmonellosis incidence rate ratios (RR) for different years and countries at age 1-4.

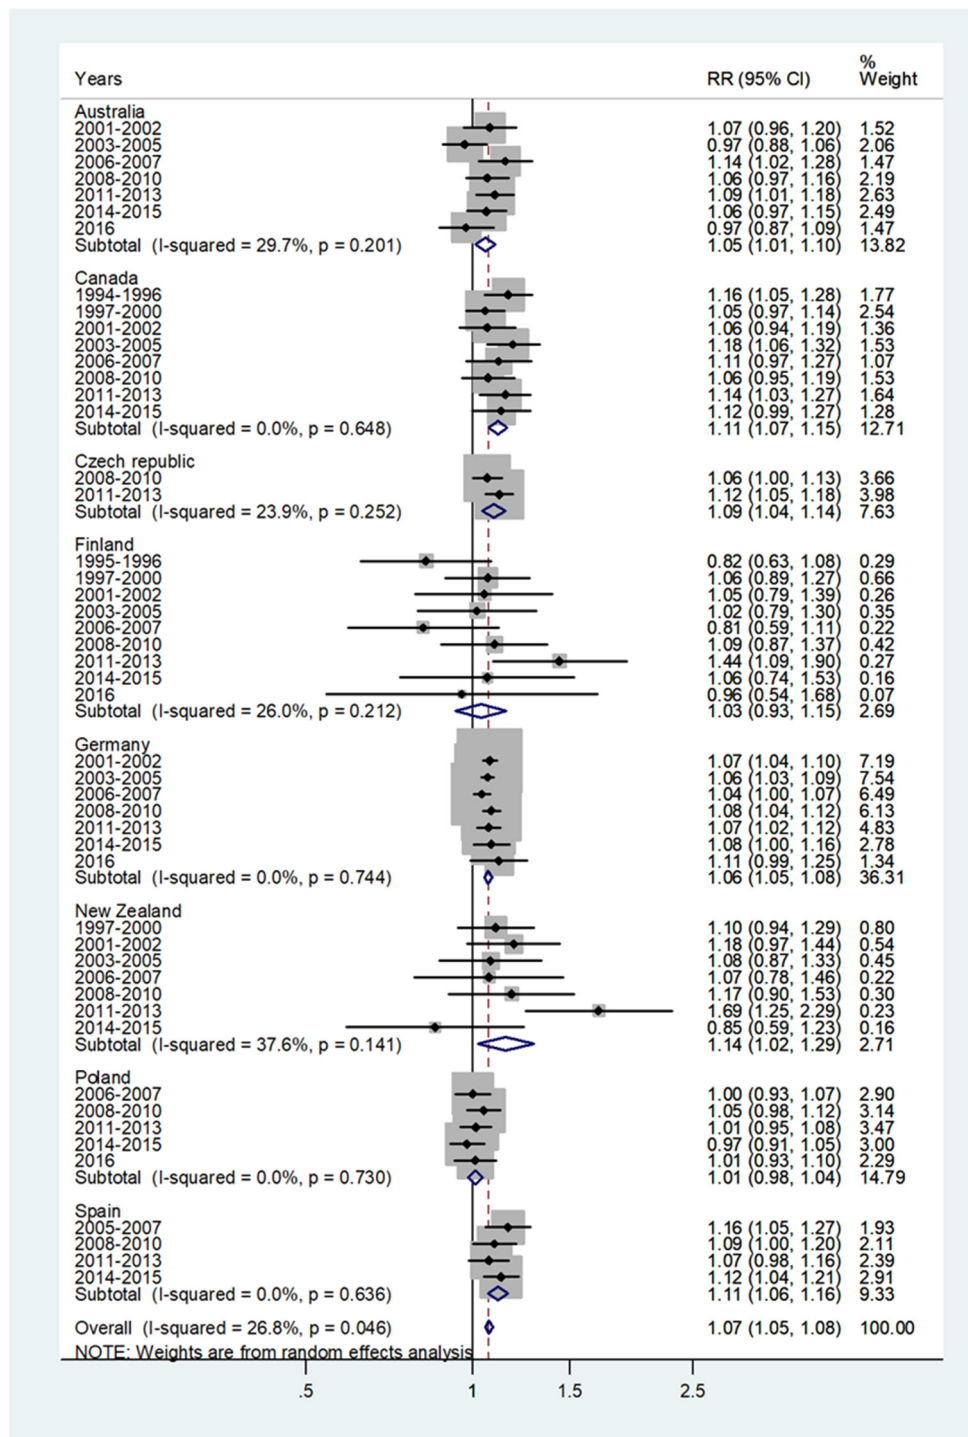

**Figure S3.** Male: female salmonellosis incidence rate ratios (RR) for different years and countries at age 5-9.

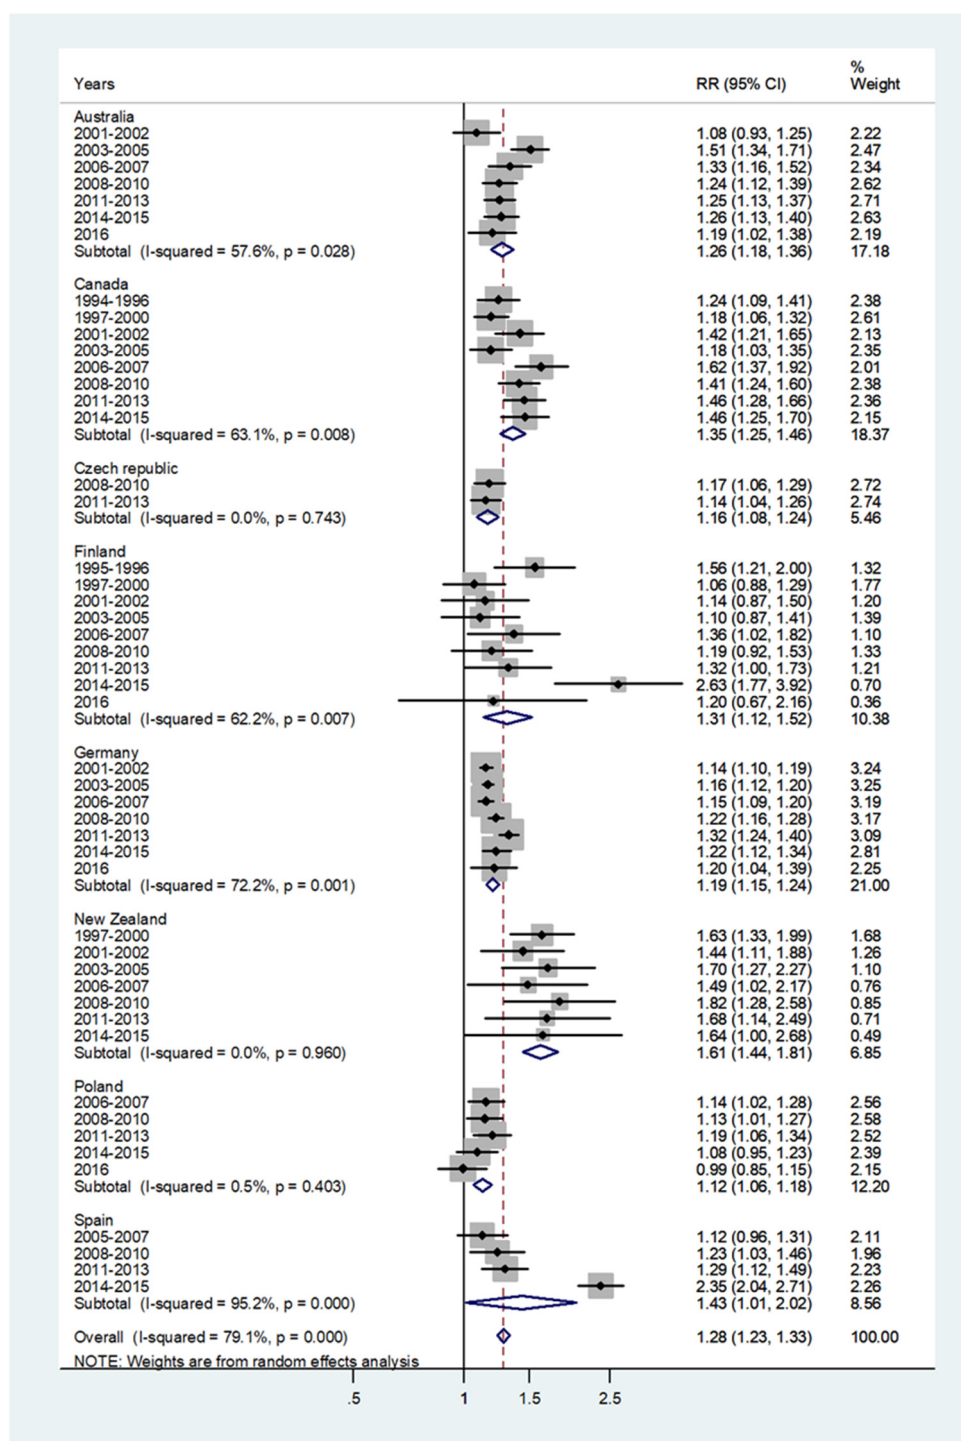

**Figure S4.** Male: female salmonellosis incidence rate ratios (RR) for different years and countries at age 10-14.

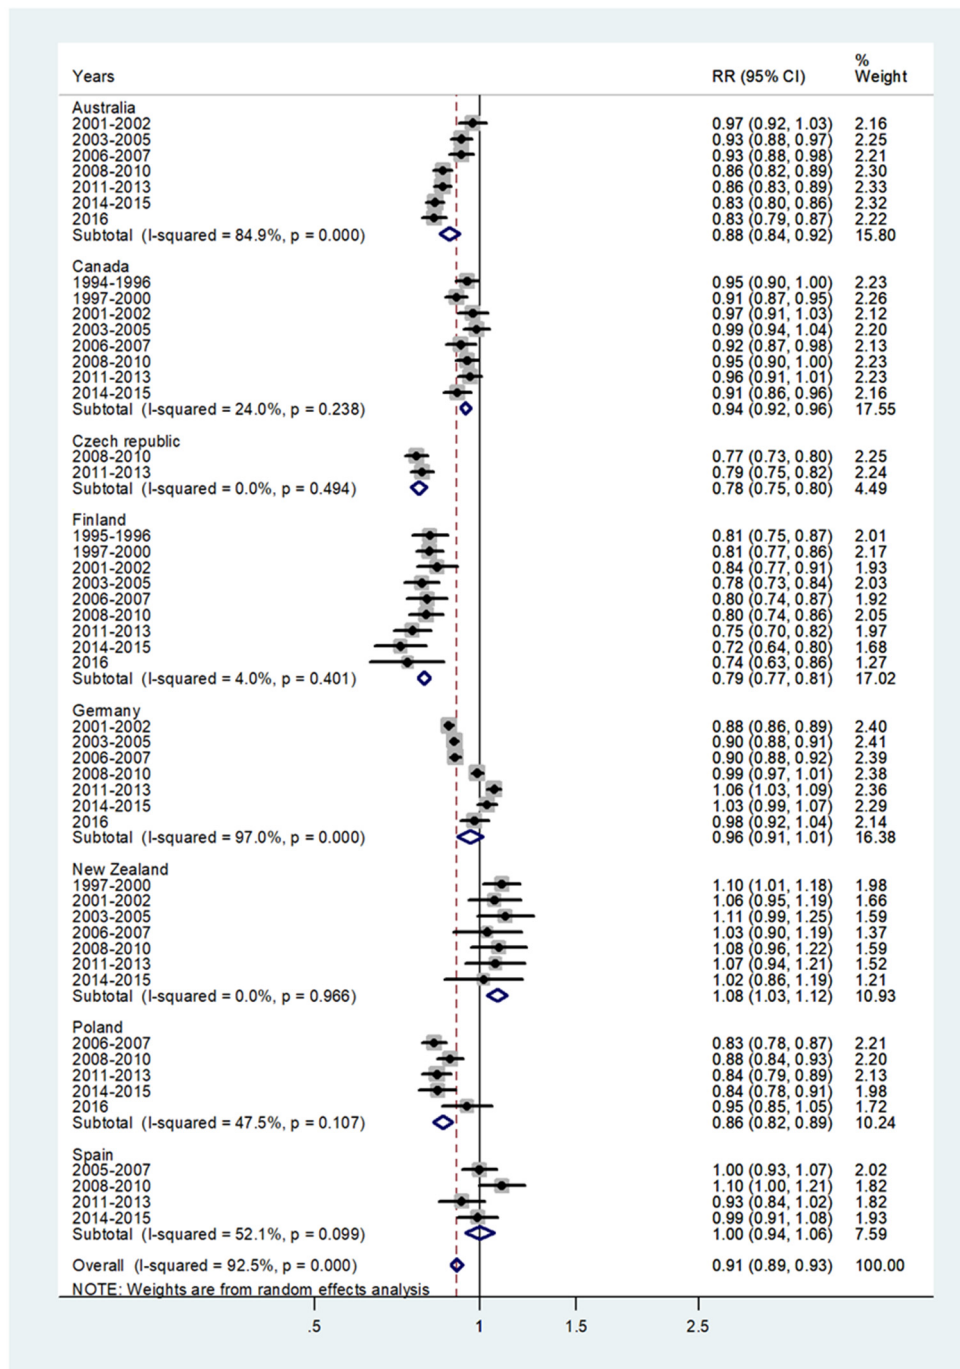

**Figure S5.** Male: female salmonellosis incidence rate ratios (RR) for different years and countries at age 15-39/15-44.



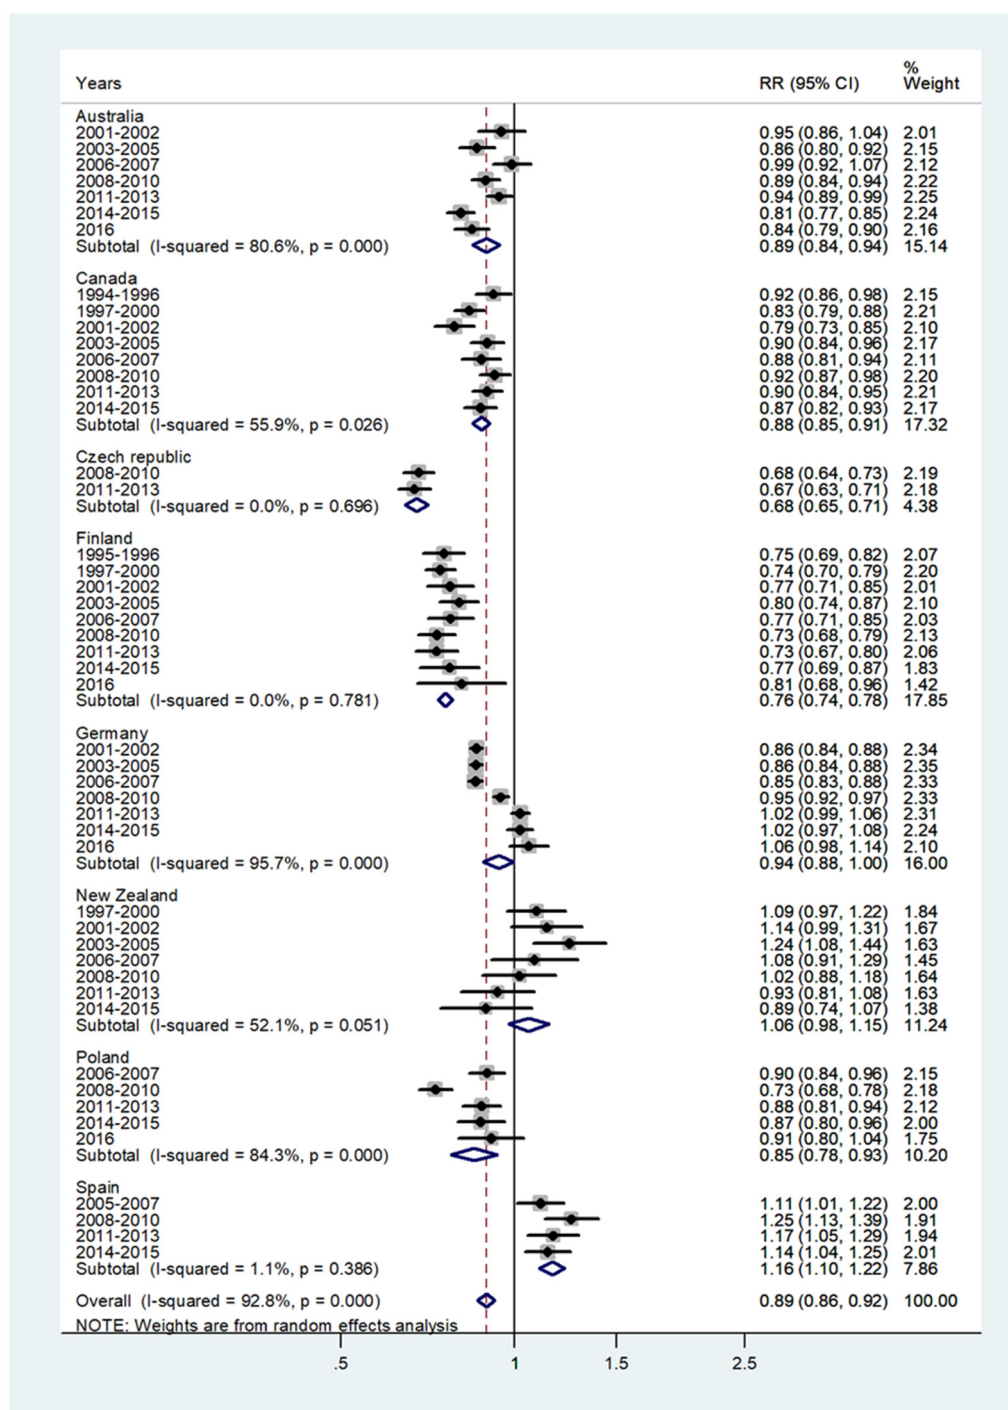

**Figure S6.** Male: female salmonellosis incidence rate ratios (RR) for different years and countries at ages 40-59/45-64.

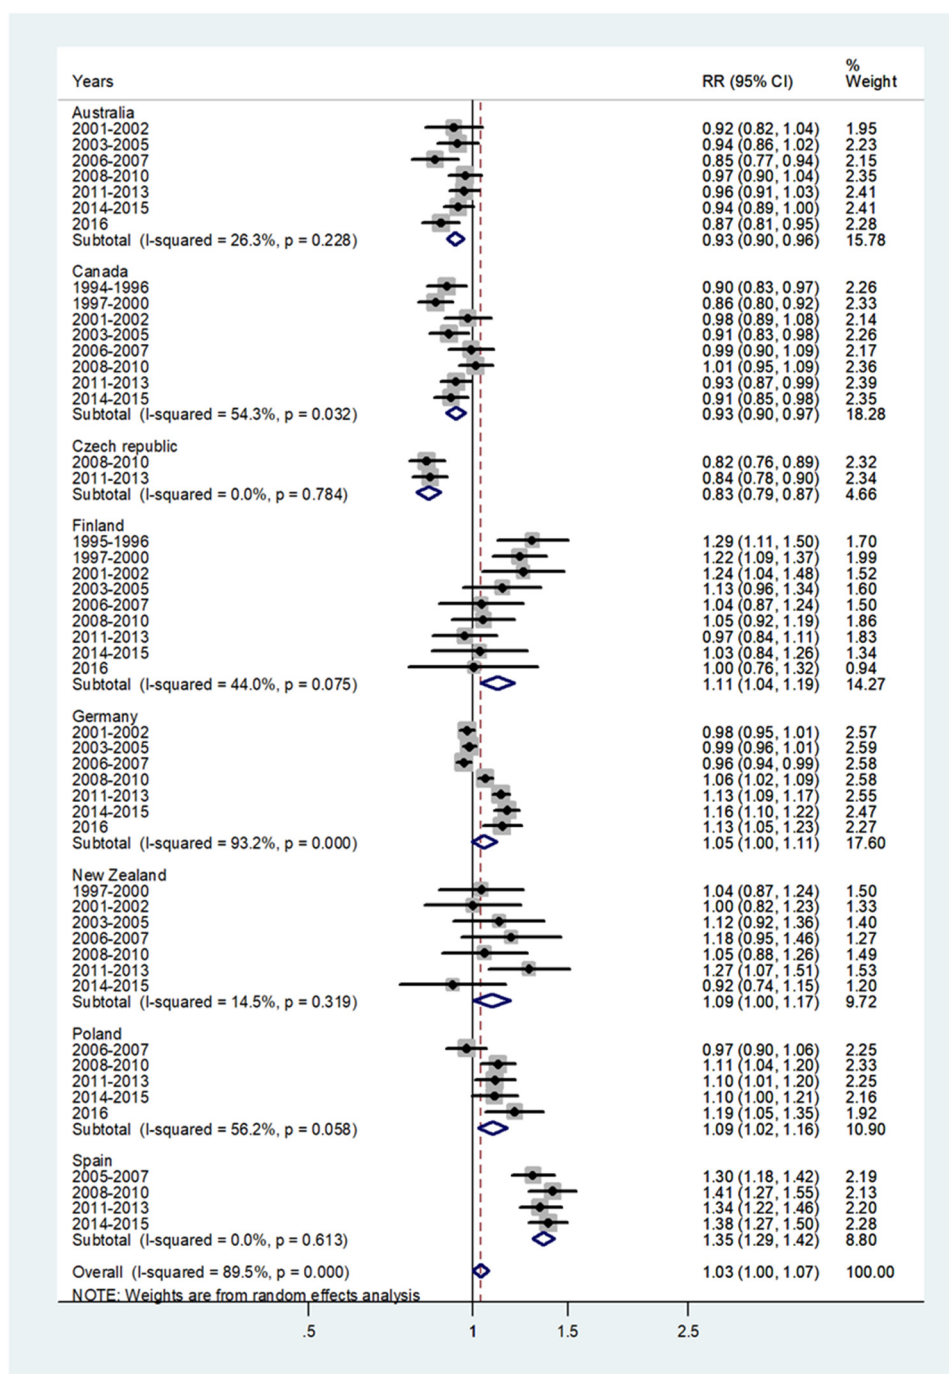

**Figure S7.** Male: female salmonellosis incidence rate ratios (RR) for different years and countries at ages 60+/65+.
